# Supplementary material for: A desert lncRNA HIDEN regulates human endoderm differentiation via interacting with IMP1 and stabilizing FZD5 mRNA
Source: PubMed Central journal article supplement (PMC10124006; doi:10.1186/s13059-023-02925-w), 2023-04-24
Supplement: 13059_2023_2925_MOESM3_ESM.pdf [file 13059_2023_2925_MOESM3_ESM.pdf]

*HIDEN* sequence 1 (1045nt):

GCTGACTCTCTTTTAGGACTCAGCCCACCTGCACCCAGGTGATTA AAAAAG  
CTTTATTGCTCACACAAAGCCTGTTGGTGGTCTCTTTACATGGATGCACAA  
GACACTCTTGACTTTGATTTTCTGCAGTATGAATATGGGACATGCATGAAA  
TTTGGTGCCGTGACTCAGATCGGGGGACCTCCTTTGGGAGATCAATCCCCT  
GTCCTCCTGATCTTTGCTCCATGAGAAAGATCCACCTACAACCTCAAGTCC  
TCAGACTGACCAGCCCAAGAAACATCTCACCAATTTCAAATCCGGACCCT  
ACTGAAAATCAGACTGTTCAACTCACCTGGCAGCCACTCCCAGAGCCCCT  
GGA ACTCTGGCCCAAGGCTCTCTGACTGACTCCTTCCCAGATCTTCTCAGC  
TTAGCAGCTGAAGACTGACACTGCCCAATCGCCTCAGAAGCCTACAGGAC  
CATCACAGATGCTCTAGGTA ACTCTCACAGTGGAAGAAAAGTAATGGAAT  
GCTACAGCCTAGTCAGTTTTGAGAAAAGGCTAACCAACAACAACAACAAC  
AAATCAcAGTCATGCTCAGATTGCACATGAACAAAAAAATGTTGGAGAGA  
AACCATTGAAATAACTCACCGGTCCTCTTGTGTTGCTGCTTATCTGATTAT  
CTGAGGTCAAGGGA ACTGAGGACAACAAAGGAAATTAGGTCTTTCATAGT  
TCTCATTAAATGCTGGAGGAGTCTGACTACTGCTGAGCTGAGCACTTCAG  
CGGCTTTGGAAAAGGAAGTGTGGTTACTTATTTACCACCTTCATTGTGCT  
GGAGGAAATAAGAAATAGCTCTGAGACTAATAATAACAGAAACGGCATC  
CACAGCAGCAGAGCCCAGTTGCGCTTCTTAAAGGCAGTATAAATAATTAA  
GTGTCTCTATAGGCAAGCCACTAGGAATAAACGAAAAAGAGCTGCAATTG  
CTGATGTGGTTTTACCCCAGTCCTGCCCATGTTTCTTAACAGGAAAGGGAG  
TTGCAATaCCAATAATAAAAATCTTAGAGCTGGAAAGAA

*HIDEN* sequence 2 (1169nt):

GCTGACTCTCTTTTAGGACTCAGCCCACCTGCACCCAGGTGATTA AAAAAG  
CTTTATTGCTCACACAAAGCCTGTTGGTGGTCTCTTTACATGGATGCACAA  
GACACTCTTGACTTTGATTTTCTGCAGTATGAATATGGGACATGCATGAAA  
TTTGGTGCCGTGACTCAGATCGGGGGACCTCCTTTGGGAGATCAATCCCCT  
GTCCTCCTGATCTTTACTCCATGAGAAAGATCCACCTACAACCTCAAGTCC

TCAGACTGACCAGCCCAAGAAACATCTCACCAATTTCAAATCCGGACCCT  
ACTGAAAATCAGACTGTTCAACTCACCTGGCAGCCACTCCCAGAGCCCCT  
GGA ACTCTGGCCCAAGGCTCTCTGACTGACTCCTTCCCAGATCTTCTCAGC  
TTAGCAGCTGAAGACTGACACTGCCCAATCGCCTCAGAAGCCTACAGGAC  
CATCACAGATGCTCTAGGTA ACTCTCACAGTGGAAGACTCAGCCCGCCTG  
CACCCAGGTGAAATAAACAGCCATGTTGCTCACACAAAGCCTGTTTGGTG  
GTCTCTTCACACGGACGTGCATGAAACTACCTACACCCATACGGAAGGGA  
ACAAATCATGAAAAGTAATGGAATGCTACAGCCTAGTCAGTTTTGAGAAA  
AGGCTAACCAACAACAACAACAACAATCACAGTCATGCTCAGATTGCAC  
ATGAACAAAAAATGTTGGAGAGAAACCATTGAAATAACTCACCGGTCCT  
CTTGTGTTGCTGCTTATCTGATTATCTGAGGTCAAGGGA ACTGAGGACAAC  
AAAGGAAATTAGGTCTTTCATAGTTCTCATTAAATGCTGGAGGAGTCTGA  
CTACTGCTGAGCTGAGCACTTCAGCGGCTTTGGAAAAGGAAGTGTGGTTA  
CTTATTTACCACCTTCATTGTGCTGGAGGAAATAAGAAATAGCTCTGAG  
ACTAATAATAACAGAAACGGCATCCACAGCAGCAGAGCCCAGTTGCGCTT  
CCTAAAGGCAGTATAAATAATTAAGTGTCTCTATAGGCAAGCCACTAGGA  
ATAAACGAAAAAGAGCTGCAATTGCTGATGTGGCTTCACCCCAGTCCTGC  
CCATGTTTCTTAACAGGAAAGGGAGTTGCAATGCCAATAATAAAATCTTA  
GAGCTGGAAAGAA
